# Supplementary material
Source: PubMed Central journal article supplement (PMC5442640)
Supplement: IAI.00121-17_zii999092057s1.pdf [file IAI.00121-17_zii999092057s1.pdf]

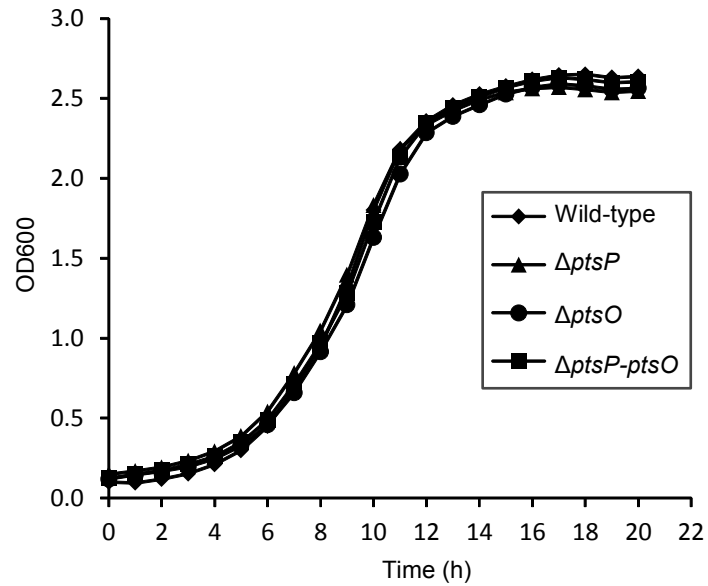

**Fig. S2.** In vitro growth profiles of the  $\Delta ptsP$ ,  $\Delta ptsO$  and  $\Delta ptsP-ptsO$  mutants. Growth rates of wild-type,  $\Delta ptsP$ ,  $\Delta ptsO$  and  $\Delta ptsP-ptsO$  mutant strains of *L. pneumophila* in AYE broth cultures. The optical density (OD) at 600 nm was measured every hour from triplicate samples.

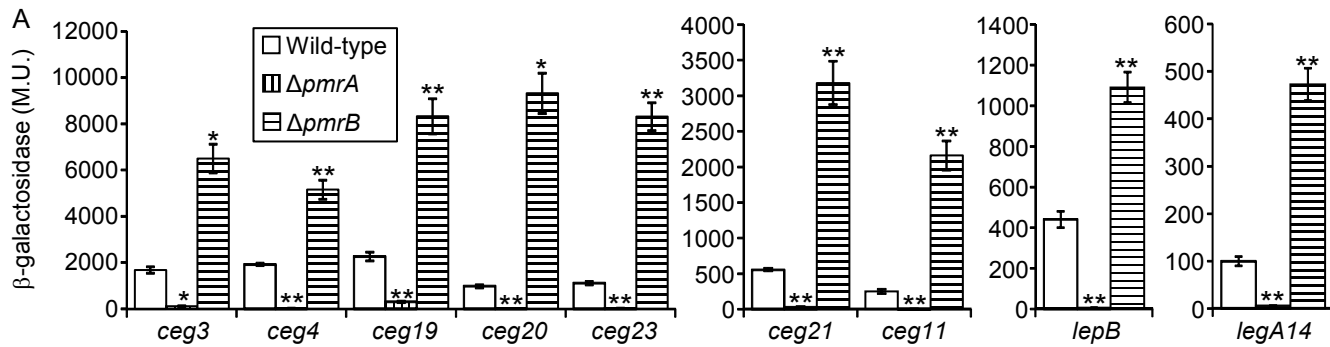

**Fig. S3.** The effect of the *L. pneumophila* PmrAB TCS on its target effector-encoding genes. The expression of translational *lacZ* fusions of effector-encoding genes activated by PmrA was examined in the wild-type strain (JR32) (white bars), in the *pmrA* deletion mutant (HK-PQ1) (vertical line bars), and in the *pmrB* deletion mutant (EA-*pmrB*) (horizontal line bars) at the stationary phase. The levels of expression of the *lacZ* fusions were found to be significantly different (\*,  $P < 10^{-4}$ ; \*\*,  $P < 10^{-5}$ , Student's *t* test), when comparing the expression in the wild-type strain and the *pmrA* or *pmrB* deletion mutants. The genes were grouped according to their levels of expression.

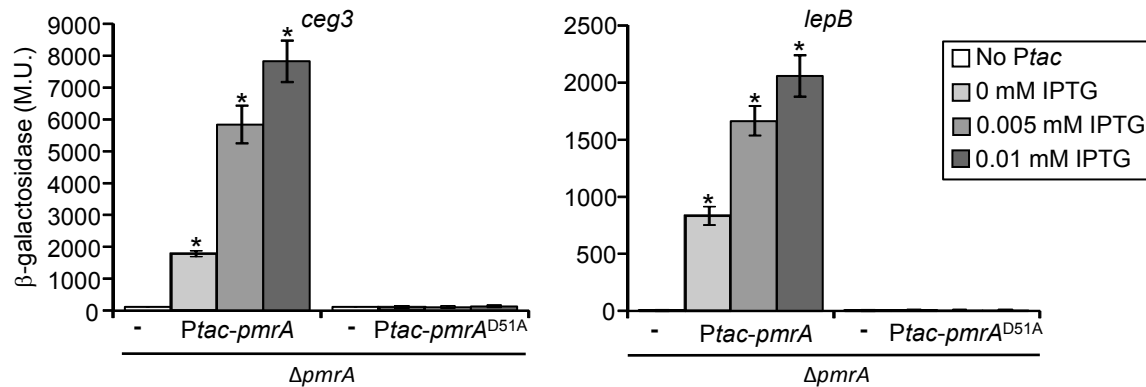

**Fig. S4.** PmrA must be phosphorylated in order to activate gene expression.

The levels of expression of two PmrA regulated effector-encoding genes (*ceg3* and *lepB*) were examined in the *L. pneumophila pmrA* deletion mutant (HK-PQ1). The bacteria contained a plasmid with the *pmrA* gene or the mutated *pmrA*<sup>D51A</sup> gene cloned under the control of the IPTG inducible *Ptac* promoter. The plasmids containing the corresponding *lacZ* fusions of the examined genes without the *pmrA* gene were used as a control (white bars). The levels of expression of the *lacZ* fusions were found to be significantly different (\*, P < 10<sup>-5</sup>, Student's *t* test), when comparing the expression of the *lacZ* fusions containing the wild-type *pmrA* gene expressed from the *Ptac* promoter and the expression of the fusions without the *pmrA* gene.
